# Supplementary material for: Characterizing Dietary Intakes in Rural Australian Adults: A Systematic Literature Review
Source: MDPI journal article supplement (doi:10.3390/nu12113515), 2020-11-15
Supplement: s1 [file s1]

Supplementary Tables

Table S1 - Preferred Reporting Items for Systematic Reviews and Meta-Analyses (PRISMA) Checklist

| Section/topic             | #  | Checklist item                                                                                                                                                                                                                                                                                              | Reported on page # |
|---------------------------|----|-------------------------------------------------------------------------------------------------------------------------------------------------------------------------------------------------------------------------------------------------------------------------------------------------------------|--------------------|
| TITLE                     |    |                                                                                                                                                                                                                                                                                                             |                    |
| Title                     | 1  | Identify the report as a systematic review, meta-analysis, or both.                                                                                                                                                                                                                                         | 1                  |
| ABSTRACT                  |    |                                                                                                                                                                                                                                                                                                             |                    |
| Structured summary        | 2  | Provide a structured summary including, as applicable: background; objectives; data sources; study eligibility criteria, participants, and interventions; study appraisal and synthesis methods; results; limitations; conclusions and implications of key findings; systematic review registration number. | 1                  |
| INTRODUCTION              |    |                                                                                                                                                                                                                                                                                                             |                    |
| Rationale                 | 3  | Describe the rationale for the review in the context of what is already known.                                                                                                                                                                                                                              | 2                  |
| Objectives                | 4  | Provide an explicit statement of questions being addressed with reference to participants, interventions, comparisons, outcomes, and study design (PICOS).                                                                                                                                                  | 2                  |
| METHODS                   |    |                                                                                                                                                                                                                                                                                                             |                    |
| Protocol and registration | 5  | Indicate if a review protocol exists, if and where it can be accessed (e.g., Web address), and, if available, provide registration information including registration number.                                                                                                                               | 2                  |
| Eligibility criteria      | 6  | Specify study characteristics (e.g., PICOS, length of follow-up) and report characteristics (e.g., years considered, language, publication status) used as criteria for eligibility, giving rationale.                                                                                                      | 2, 3               |
| Information sources       | 7  | Describe all information sources (e.g., databases with dates of coverage, contact with study authors to identify additional studies) in the search and date last searched.                                                                                                                                  | 3                  |
| Search                    | 8  | Present full electronic search strategy for at least one database, including any limits used, such that it could be repeated.                                                                                                                                                                               | 3                  |
| Study selection           | 9  | State the process for selecting studies (i.e., screening, eligibility, included in systematic review, and, if applicable, included in the meta-analysis).                                                                                                                                                   | 3                  |
| Data collection process   | 10 | Describe method of data extraction from reports (e.g., piloted forms, independently, in duplicate) and any processes for obtaining and confirming data from investigators.                                                                                                                                  | 3, 4               |

|                                    |    |                                                                                                                                                                                                                        |                                 |
|------------------------------------|----|------------------------------------------------------------------------------------------------------------------------------------------------------------------------------------------------------------------------|---------------------------------|
| Data items                         | 11 | List and define all variables for which data were sought (e.g., PICOS, funding sources) and any assumptions and simplifications made.                                                                                  | Table 1                         |
| Risk of bias in individual studies | 12 | Describe methods used for assessing risk of bias of individual studies (including specification of whether this was done at the study or outcome level), and how this information is to be used in any data synthesis. | 4                               |
| Summary measures                   | 13 | State the principal summary measures (e.g., risk ratio, difference in means).                                                                                                                                          | N/a                             |
| Synthesis of results               | 14 | Describe the methods of handling data and combining results of studies, if done, including measures of consistency (e.g., $I^2$ ) for each meta-analysis.                                                              | N/a                             |
| Section/topic                      | #  | Checklist item                                                                                                                                                                                                         | Reported on page #              |
| Risk of bias across studies        | 15 | Specify any assessment of risk of bias that may affect the cumulative evidence (e.g., publication bias, selective reporting within studies).                                                                           | n/a                             |
| Additional analyses                | 16 | Describe methods of additional analyses (e.g., sensitivity or subgroup analyses, meta-regression), if done, indicating which were pre-specified.                                                                       | n/a                             |
| <b>RESULTS</b>                     |    |                                                                                                                                                                                                                        |                                 |
| Study selection                    | 17 | Give numbers of studies screened, assessed for eligibility, and included in the review, with reasons for exclusions at each stage, ideally with a flow diagram.                                                        | Figure 1                        |
| Study characteristics              | 18 | For each study, present characteristics for which data were extracted (e.g., study size, PICOS, follow-up period) and provide the citations.                                                                           | Table 1                         |
| Risk of bias within studies        | 19 | Present data on risk of bias of each study and, if available, any outcome level assessment (see item 12).                                                                                                              | Supplementary tables S2, S3, S4 |
| Results of individual studies      | 20 | For all outcomes considered (benefits or harms), present, for each study: (a) simple summary data for each intervention group (b) effect estimates and confidence intervals, ideally with a forest plot.               | n/a                             |
| Synthesis of results               | 21 | Present results of each meta-analysis done, including confidence intervals and measures of consistency.                                                                                                                | n/a                             |
| Risk of bias across studies        | 22 | Present results of any assessment of risk of bias across studies (see Item 15).                                                                                                                                        | n/a                             |
| Additional analysis                | 23 | Give results of additional analyses, if done (e.g., sensitivity or subgroup analyses, meta-regression [see Item 16]).                                                                                                  | n/a                             |

| DISCUSSION          |    |                                                                                                                                                                                      |   |
|---------------------|----|--------------------------------------------------------------------------------------------------------------------------------------------------------------------------------------|---|
| Summary of evidence | 24 | Summarize the main findings including the strength of evidence for each main outcome; consider their relevance to key groups (e.g., healthcare providers, users, and policy makers). | 5 |
| Limitations         | 25 | Discuss limitations at study and outcome level (e.g., risk of bias), and at review-level (e.g., incomplete retrieval of identified research, reporting bias).                        | 5 |
| Conclusions         | 26 | Provide a general interpretation of the results in the context of other evidence, and implications for future research.                                                              | 6 |
| FUNDING             |    |                                                                                                                                                                                      |   |
| Funding             | 27 | Describe sources of funding for the systematic review and other support (e.g., supply of data); role of funders for the systematic review.                                           | 6 |

Table S2 - Non-Indigenous studies quality assessment

|                                      | Aoun<br>et al.<br>2004                               | Burgis-<br>Kasthala<br>et al.<br>2019             | Mishra<br>et al.<br>2005          | Harrison<br>et al.<br>2017                       | Lim et<br>al.<br>2017            | Lombard<br>et al.<br>2016 | Martin<br>et al.<br>2018 | Martin<br>et al.<br>2017 | Nour<br>et al.<br>2017 | O'Kane<br>et al.<br>2008 | Owen<br>et al.<br>2020                                             | Peach<br>et al.<br>2002          | Peach<br>et al.<br>2000 | Reinhardt<br>et al.<br>2012       | Simmons<br>et al.<br>2005                        | Thorpe<br>et al.<br>2016                                        |
|--------------------------------------|------------------------------------------------------|---------------------------------------------------|-----------------------------------|--------------------------------------------------|----------------------------------|---------------------------|--------------------------|--------------------------|------------------------|--------------------------|--------------------------------------------------------------------|----------------------------------|-------------------------|-----------------------------------|--------------------------------------------------|-----------------------------------------------------------------|
| Selection (Max 5 stars)              |                                                      |                                                   |                                   |                                                  |                                  |                           |                          |                          |                        |                          |                                                                    |                                  |                         |                                   |                                                  |                                                                 |
| 1) Representativeness of the sample: | B (Was regional but not remote considered)           | B                                                 | B* (Nationwide random selections) | A (Random town selection with rural definitions) | B                                | A                         | A                        | B                        | B (Regional and urban) | A                        | B (Focused on older populations not entire ones in regional areas) | B (Men only, regional city only) | B                       | B                                 | A (Truly representative based on study criteria) | B (Uses older people and rural included but not strictly rural) |
| 2) Sample Size                       | B (Not many details given about the cross-sectional) | B (Not enough despite the spread of participants) | A                                 | A                                                | A (Large size for area included) | A                         | A                        | A                        | A                      | A                        | A                                                                  | B                                | A                       | B (Only 38 women, was hard due to | A                                                | A                                                               |

|                    | sample)                               | from regional areas) |                                                                           |   |   |                                                                                                                                |   |   |   |                                   |                                                                     |                                                            |                                                                          | gestational diabetes focus)                                   |                                                                        |                                                                         |
|--------------------|---------------------------------------|----------------------|---------------------------------------------------------------------------|---|---|--------------------------------------------------------------------------------------------------------------------------------|---|---|---|-----------------------------------|---------------------------------------------------------------------|------------------------------------------------------------|--------------------------------------------------------------------------|---------------------------------------------------------------|------------------------------------------------------------------------|-------------------------------------------------------------------------|
| 3) Non-respondents | A<br>(This was very clearly outlined) | B                    | B<br>(Could not follow up non-responders due to confidentiality reasons ) | C | C | B<br>(Discusses predictions in both groups and reflect iver why responses might be different but doesn't mention non-responder | B | B | C | B<br>(Poor rate of return at 27%) | B<br>(Another poor response rate and no mention of non-respondents) | B<br>(Good response rate but no mention of non-responders) | B<br>(Reasonable response rates at 67% but no mention of non-responders) | B (No mention of non-responders but reasonable response rate) | A<br>(Accounts for all participants and reason for non-responses also) | B<br>(Response rate reported at only 38% and no take on non-responders) |

| difference)                                                    |   |   |                                            |                                            |        |    |    |                                |   |   |   |                                                                                              |                                                                                                                                        |   |                                                                                                                                                                                   |                                                                                                                                         |
|----------------------------------------------------------------|---|---|--------------------------------------------|--------------------------------------------|--------|----|----|--------------------------------|---|---|---|----------------------------------------------------------------------------------------------|----------------------------------------------------------------------------------------------------------------------------------------|---|-----------------------------------------------------------------------------------------------------------------------------------------------------------------------------------|-----------------------------------------------------------------------------------------------------------------------------------------|
| 4) Ascertain<br>ment of<br>the<br>exposure<br>(risk<br>factor) | A | A | A^                                         | A*                                         | A      | A  | A  | A                              | A | B | A | A<br>(Serum<br>ferritin<br>measur<br>es<br>contrast<br>ed with<br>serum<br>glucose<br>/TAGs) | B<br>(Used<br>a FFQ<br>but<br>weren<br>'t<br>specifi<br>c as to<br>the<br>one<br>they<br>used<br>validit<br>y only<br>reliabi<br>lity) | A | A (Use<br>of<br>objectiv<br>e and<br>subjecti<br>ve<br>measur<br>es to<br>validat<br>e<br>obesity<br>includi<br>ng<br>BMI,<br>WC<br>and<br>self-<br>reporte<br>d<br>measur<br>es) | A<br>(Note<br>s<br>conve<br>rgent<br>validit<br>y with<br>stand<br>ard<br>dietar<br>y<br>guidel<br>ines<br>and<br>use of<br>the<br>FFQ) |
| Comparability (Max 2 stars)                                    |   |   |                                            |                                            |        |    |    |                                |   |   |   |                                                                                              |                                                                                                                                        |   |                                                                                                                                                                                   |                                                                                                                                         |
| 1) The<br>subjects in<br>different<br>outcome<br>groups        | A | A | B<br>(Adjust<br>ed for<br>socio-<br>demogr | A<br>(Adjust<br>ed for<br>major<br>individ | A & B* | A* | A* | B<br>(Con<br>trols<br>man<br>y | A | A | A | A                                                                                            | A                                                                                                                                      | A | A & B<br>(Measu<br>res all<br>other<br>socio-                                                                                                                                     | A                                                                                                                                       |

|                                                                                            |                  |                                                       |                                                                  |                                                    |
|--------------------------------------------------------------------------------------------|------------------|-------------------------------------------------------|------------------------------------------------------------------|----------------------------------------------------|
| are comparable, based on the study design or analysis. Confounding factors are controlled. | aphic variables) | ual, social and environmental factors where it could) | thing s but rural to metro difference was a point of this paper) | demographic variables as well as obesity measures) |
|--------------------------------------------------------------------------------------------|------------------|-------------------------------------------------------|------------------------------------------------------------------|----------------------------------------------------|

| Outcome (Max 3 stars)        |   |   |   |                                      |   |   |   |   |   |   |                                                                          |   |                                                             |   |                                                                            |                                                        |
|------------------------------|---|---|---|--------------------------------------|---|---|---|---|---|---|--------------------------------------------------------------------------|---|-------------------------------------------------------------|---|----------------------------------------------------------------------------|--------------------------------------------------------|
| 1) Assessment of the outcome | B | C | C | C (Did most of this via self-report) | C | A | A | A | C | C | C (used lots of objective lab testing but primarily outcome was food and | A | C (Self-report on dietary calcium intake assessed from FFQ) | C | C* (Assumes take-away food by self report to determine adiposity and self- | C (Extensive 111 item FFQ but self report based still) |

|                           |   |   |                                                                                                    |                                                                                    |                                                                                            |   |                                                                       |   |   |                                                                                         |                                                                                   |   |   |   |                                                                                                |   |   |
|---------------------------|---|---|----------------------------------------------------------------------------------------------------|------------------------------------------------------------------------------------|--------------------------------------------------------------------------------------------|---|-----------------------------------------------------------------------|---|---|-----------------------------------------------------------------------------------------|-----------------------------------------------------------------------------------|---|---|---|------------------------------------------------------------------------------------------------|---|---|
|                           |   |   |                                                                                                    |                                                                                    |                                                                                            |   |                                                                       |   |   | based<br>on an<br>FFQ)                                                                  | reporti<br>ng for<br>major<br>outcom<br>e may<br>not be<br>truly<br>accurat<br>e) |   |   |   |                                                                                                |   |   |
| 2)<br>Statistical<br>test | A | A | A                                                                                                  | A                                                                                  | A                                                                                          | A | A                                                                     | A | A | A<br>(Used<br>p-<br>values<br>but<br>was a<br>little<br>vague<br>in<br>descri<br>ption) | A                                                                                 | A | A | A | A                                                                                              | A | A |
| Notes:                    |   |   | * Said B<br>due to<br>it not<br>being<br>specific<br>to rural,<br>include<br>d<br>metro.<br>^ Uses | * Uses<br>mix of<br>valid<br>and<br>mentio<br>ned<br>tools<br>that<br>aren't<br>so | * Used<br>multiv<br>ariate<br>analys<br>es to<br>contro<br>l for<br>confou<br>nders<br>but | * | Used<br>multi<br>ple<br>meas<br>uring<br>meth<br>ods,<br>BMI<br>argua |   |   |                                                                                         |                                                                                   |   |   |   | *<br>Sparing<br>self-<br>report<br>data for<br>the aim<br>of the<br>study,<br>based<br>on this |   |   |



|  |  |  |                          |                                           |                                                                                                               |                                                                                    |  |  |  |  |  |  |  |  |  |                                          |
|--|--|--|--------------------------|-------------------------------------------|---------------------------------------------------------------------------------------------------------------|------------------------------------------------------------------------------------|--|--|--|--|--|--|--|--|--|------------------------------------------|
|  |  |  | cancer<br>council<br>FFQ | scored<br>as A<br>but<br>could<br>be a B? | may<br>just be<br>B<br>howev<br>er it<br>answe<br>rs<br>itself<br>in the<br>aim so<br>includ<br>ed A<br>also. | bly<br>most<br>effecti<br>ve<br>meas<br>uring<br>tool<br>WRT<br>this<br>study<br>. |  |  |  |  |  |  |  |  |  | criteria<br>it was<br>nearly<br>a 10/10. |
|--|--|--|--------------------------|-------------------------------------------|---------------------------------------------------------------------------------------------------------------|------------------------------------------------------------------------------------|--|--|--|--|--|--|--|--|--|------------------------------------------|

|                   |      |      |      |      |      |      |      |      |      |      |      |      |      |      |      |      |
|-------------------|------|------|------|------|------|------|------|------|------|------|------|------|------|------|------|------|
| Score<br>(Stars): | 8/10 | 6/10 | 7/10 | 7/10 | 8/10 | 9/10 | 9/10 | 8/10 | 7/10 | 6/10 | 6/10 | 7/10 | 6/10 | 6/10 | 9/10 | 7/10 |
|-------------------|------|------|------|------|------|------|------|------|------|------|------|------|------|------|------|------|

Details on scoring using the Newcastle-Ottawa Scale can be found at [http://www.ohri.ca/programs/clinical\\_epidemiology/nosgen.pdf](http://www.ohri.ca/programs/clinical_epidemiology/nosgen.pdf)

Table S3. Indigenous based studies quality assessment

|                                                | Brimblecombe et al. 2018  | D’Onise et al. 2012             | Lee et al. 2018         | McMahon et al. 2017                                                                                                  | Noble et al. 2015 | Xu et al. 2019                                                                            |
|------------------------------------------------|---------------------------|---------------------------------|-------------------------|----------------------------------------------------------------------------------------------------------------------|-------------------|-------------------------------------------------------------------------------------------|
| Selection (Max 5 stars)                        |                           |                                 |                         |                                                                                                                      |                   |                                                                                           |
| 1) Representativeness of the sample:           | B                         | B                               | C (Pregnant women only) | B (Uses very remote data only)                                                                                       | B                 | B                                                                                         |
| 2) Sample Size                                 | B                         | B                               | B                       | A*                                                                                                                   | B                 | B                                                                                         |
| 3) Non-respondents                             | B*                        | B*                              | C                       | B (Good response rate but no comparison mentioned for non-respondents or use of different surveys confounded things) | C                 | A (Did a non-responders analyses and were still able to make findings more generalisable) |
| 4) Ascertainment of the exposure (risk factor) | B                         | A                               | A                       | B (Food and beverage purchasing as a surrogate doesn’t give direct intake data i.e food waste etc.)                  | B                 | A* (Tools were validated or semi-validated)                                               |
| Comparability (Max 2 stars)                    |                           |                                 |                         |                                                                                                                      |                   |                                                                                           |
| 1) The subjects in different outcome           | B (other confounders were | N/A (No controls and residual & | A*                      | B (Comparison groups were                                                                                            | A                 | B                                                                                         |

|                                                                                                   |                                                                                                                  |                                                                                     |                                                                                         |                                                             |      |                                                                                                                                              |
|---------------------------------------------------------------------------------------------------|------------------------------------------------------------------------------------------------------------------|-------------------------------------------------------------------------------------|-----------------------------------------------------------------------------------------|-------------------------------------------------------------|------|----------------------------------------------------------------------------------------------------------------------------------------------|
| groups are comparable, based on the study design or analysis. Confounding factors are controlled. | considered)                                                                                                      | unmeasured confounding)                                                             |                                                                                         | different and controlling for it too difficult)             |      |                                                                                                                                              |
| <b>Outcome (Max 3 stars)</b>                                                                      |                                                                                                                  |                                                                                     |                                                                                         |                                                             |      |                                                                                                                                              |
| 1) Assessment of the outcome                                                                      | C (quantified but was self-reported data)                                                                        | B (record-linkages from Well-Persons Health Check)                                  | C (Does use valid and reliable FFQ but is self-report nonetheless)                      | C                                                           | C    | C (Was all based on self-report)                                                                                                             |
| 2) Statistical test                                                                               | A                                                                                                                | A                                                                                   | A (No p-value but use of CI and IQR to measure food intake and daily serves relevant)   | A                                                           | A    | A                                                                                                                                            |
| Notes:                                                                                            | * Scored as B because some description of changes were given even though there was no separation of respondents. | * High attrition & sample not representative at follow up (younger, AOD users etc.) | * No direct comparison group but compared to Aus Guide to Healthy Eating and the NRV's) | * Large sample of very remote Indigenous People (n = 1,363) | N/A  | * Validated tools for assessment but some were not entirely culturally valid or gender valid to distinct from men's or women's business etc. |
| Score                                                                                             | 5/10                                                                                                             | 5/10                                                                                | 5/10                                                                                    | 6/10                                                        | 5/10 | 7/10                                                                                                                                         |

Details on scoring using the Newcastle-Ottawa Scale can be found at [http://www.ohri.ca/programs/clinical\\_epidemiology/nosgen.pdf](http://www.ohri.ca/programs/clinical_epidemiology/nosgen.pdf)

Table S4. CREATE quality assessment tool

|                                                                                     | Xu et al. 2019                                                                                     | McMahon et al. 2017 | Brimblecombe et al. 2018 | D’Onise el at. 2012                                                                                                      | Lee et al. 2018                                                |
|-------------------------------------------------------------------------------------|----------------------------------------------------------------------------------------------------|---------------------|--------------------------|--------------------------------------------------------------------------------------------------------------------------|----------------------------------------------------------------|
| 1. Did the research respond to a need or priority determined by the community?      | No                                                                                                 | Partly              | Partly                   | Partly (more indirectly through non-smoking and decreased alcohol and increased F&V intake not red cell folate directly) | Yes                                                            |
| 2. Was community consultation and engagement appropriately inclusive?               | Partly (consulted with Central Australian Aboriginal Congress & Menzies School of Health Research) | No                  | Partly                   | Partly (notes support from relevant Indigenous health bodies but doesn’t specify)                                        | Yes                                                            |
| 3. Did the research have Aboriginal and Torres Strait Islander research leadership? | Unclear                                                                                            | No                  | No                       | No                                                                                                                       | Partly                                                         |
| 4. Did the research have Aboriginal and Torres Strait Islander governance?          | Partly (based on the acknowledgements section)                                                     | Unclear             | Yes                      | No                                                                                                                       | Partly (Acknowledged an ongoing Indigenous steering committee) |

|                                                                                                                                                                                     |                                                           |         |         |         |                                                    |
|-------------------------------------------------------------------------------------------------------------------------------------------------------------------------------------|-----------------------------------------------------------|---------|---------|---------|----------------------------------------------------|
| 5. Were local community protocols respected and followed?                                                                                                                           | Yes (use of interpreters in the local Alice Springs area) | Unclear | Yes     | Unclear | Partly                                             |
| 6. Did the researchers negotiate agreements in regards to rights of access to Aboriginal and Torres Strait Islander peoples' existing intellectual and cultural property?           | No                                                        | Unclear | Partly  | Unclear | Unclear                                            |
| 7. Did the researchers negotiate agreements to protect Aboriginal and Torres Strait Islander peoples' ownership of intellectual and cultural property created through the research? | Unclear                                                   | Unclear | Partly  | Unclear | Unclear                                            |
| 8. Did Aboriginal and Torres Strait Islander people and communities have control over the collection and management of research materials?                                          | No                                                        | No      | Unclear | Unclear | Unclear                                            |
| 9. Was the research guided by an Indigenous research paradigm?                                                                                                                      | No                                                        | No      | No      | No      | No                                                 |
| 10. Does the research take a strength-based approach, acknowledging and moving beyond practices that have harmed Aboriginal and Torres Strait Islander peoples in the past?         | Unclear                                                   | No      | Partly  | No      | Partly (It is at least acknowledged in this paper) |
| 11. Did the researchers plan to translate the findings into sustainable changes in                                                                                                  | Partly                                                    | Partly  | Yes     | Partly  | Partly                                             |

policy and/or practice?

|                                                                                                                |         |         |         |         |                                                                                                     |
|----------------------------------------------------------------------------------------------------------------|---------|---------|---------|---------|-----------------------------------------------------------------------------------------------------|
| 12. Did the research benefit the participants and Aboriginal and Torres Strait Islander communities?           | Partly  | Partly  | Yes     | Partly  | Partly (Advocacy for more specific nutrient and food recommendations for pregnant Indigenous women) |
| 13. Did the research demonstrate capacity strengthening for Aboriginal and Torres Strait Islander individuals? | No      | No      | Partly  | No      | Partly                                                                                              |
| 14. Did everyone involved in the research have opportunities to learn from each other?                         | Unclear | Unclear | Unclear | Unclear | Unclear                                                                                             |

Details on the scoring criteria for each study using the Aboriginal And Torres Strait Islander Quality Appraisal Tool can be found at <https://doi.org/10.1186/s12874-020-00959-3>
